# Supplementary material for: Cultivable Microbial Diversity Associated With Cellular Phones
Source: PubMed Central journal article supplement (PMC6000418; doi:10.3389/fmicb.2018.01229), 2018-06-07
Supplement: Image_1.pdf [file Image_1.pdf]

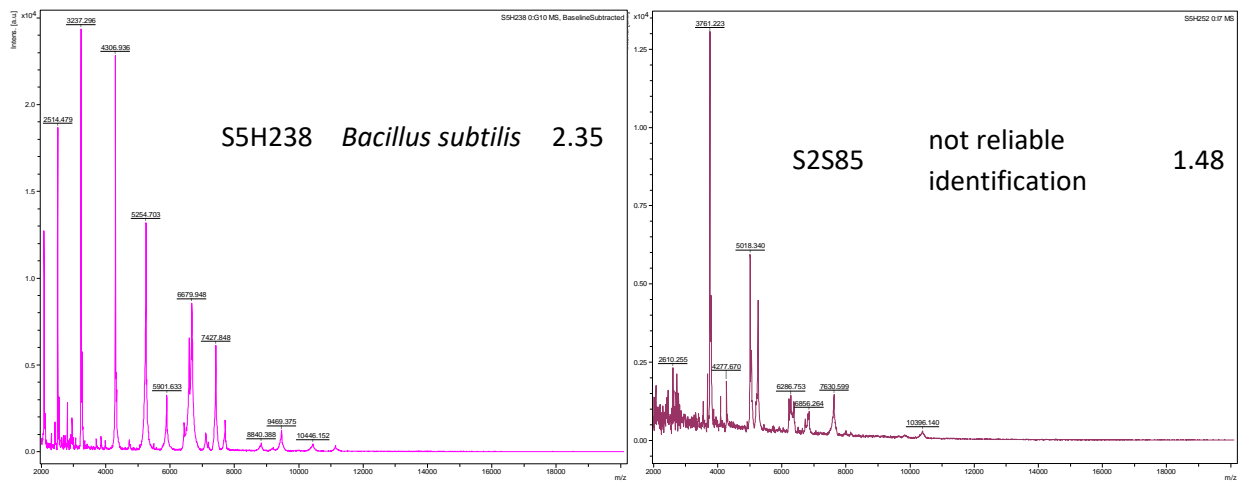

Fig. S1 MALDI-TOF MS spectra of two isolates indicating the differences in the spectral quality (isolates S5H238 identified as *Bacillus subtilis* by MALDI biotyper database search, whereas not reliable identification was obtained for S2S85), both identified as member of *Bacillus subtilis complex* by 16S rRNA gene sequencing.
